# Supplementary material for: Pricing Climate Change Exposure
Source: Atypon-hosted journal article supplement (doi:10.1287/mnsc.2023.4686), 2023-05-12
Supplement: mnsc.2023.4686.sm1.pdf [file mnsc.2023.4686.sm1.pdf]

**Online Appendix**  
to  
**Pricing Climate Change Exposure**

Zacharias Sautner\*    Laurence van Lent<sup>†</sup>    Grigory Vilkov<sup>‡</sup>    Ruishen Zhang<sup>§</sup>

*Management Science, forthcoming*

June 2022

---

\***Frankfurt School of Finance & Management and ECGI**; Postal Address: Adickesallee 32-34, 60322 Frankfurt am Main, Germany; E-mail: z.sautner@fs.de.

<sup>†</sup>**Frankfurt School of Finance & Management**; Postal Address: Adickesallee 32-34, 60322 Frankfurt am Main, Germany; E-mail: l.vanlent@fs.de.

<sup>‡</sup>**Frankfurt School of Finance & Management**; Postal Address: Adickesallee 32-34, 60322 Frankfurt am Main, Germany; E-mail: vilkov@vilkov.net.

<sup>§</sup>**Institute of Accounting and Finance, Shanghai University of Finance and Economics**; Postal Address: Guoding Road 777, 200433, Shanghai, China; E-mail: zhangruishen@sufe.edu.cn.

## Data Appendix: Variable Definitions (repeated from the main paper)

| Variable                                | Years     | Definition                                                                                                                                                                                                                                                                                                                                                                                                       |
|-----------------------------------------|-----------|------------------------------------------------------------------------------------------------------------------------------------------------------------------------------------------------------------------------------------------------------------------------------------------------------------------------------------------------------------------------------------------------------------------|
| <i>Climate Change Exposure Measures</i> |           |                                                                                                                                                                                                                                                                                                                                                                                                                  |
| $CCExposure_{i,t}$                      | 2005-2020 | Relative frequency with which bigrams related to climate change occur in quarterly earnings calls. Resampled to a monthly frequency by matching the transcript date to a given stock-month and applying exponential smoothing with a half-life of three months. Source: Sautner et al. (2022).                                                                                                                   |
| $CCExposure_{i,t}^{Ind}$                | 2005-2020 | Industry-level component of $CCExposure_{i,t}$ , calculated by averaging $CCExposure_{i,t}$ across all stocks in an industry at a point in time (based on two-digit SIC codes).                                                                                                                                                                                                                                  |
| $CCExposure_{i,t}^{Res}$                | 2005-2020 | Firm-specific component of $CCExposure_{i,t}$ . For each stock, calculated as $CCExposure_{i,t} - CCExposure_{i,t}^{Ind}$ .                                                                                                                                                                                                                                                                                      |
| $CCExposure_{i,t}^{Opp}$                | 2005-2020 | Relative frequency with which bigrams that capture opportunities related to climate change occur in quarterly earnings calls. Resampled to a monthly frequency by matching the transcript date to a given stock-month and applying exponential smoothing with a half-life of three months. Source: Sautner et al. (2022).                                                                                        |
| $CCExposure_{i,t}^{Reg}$                | 2005-2020 | Relative frequency with which bigrams that capture regulatory shocks related to climate change occur in the quarterly earnings calls. Resampled to a monthly frequency by matching the transcript date to a given stock-month and applying exponential smoothing with a half-life of three months. Source: Sautner et al. (2022).                                                                                |
| $CCExposure_{i,t}^{Phy}$                | 2005-2020 | Relative frequency with which bigrams that capture physical shocks related to climate change occur in quarterly earnings calls. Resampled to a monthly frequency by matching the transcript date to a given stock-month and applying exponential smoothing with a half-life of three months. Source: Sautner et al. (2022).                                                                                      |
| $CCSentiment_{i,t}^{Ltg}$               | 2005-2020 | Relative frequency with which bigrams related to climate change litigation are mentioned in quarterly earnings conference calls. Resampled to a monthly frequency by matching the transcript date to a given stock-month and applying exponential smoothing with a half-life of three months. Source: Self-constructed.                                                                                          |
| $CCSentiment_{i,t}^{Neg}$               | 2005-2020 | Relative frequency with which bigrams related to climate change are mentioned together with the negative tone words that are summarized by Loughran and McDonald (2011) in one sentence in quarterly earnings calls. Resampled to a monthly frequency by matching the transcript date to a given stock-month and applying exponential smoothing with a half-life of three months. Source: Sautner et al. (2022). |
| <i>Expected Excess Return Proxies</i>   |           |                                                                                                                                                                                                                                                                                                                                                                                                                  |
| $RET_{i,t}$                             | 2005-2020 | Next-month realized returns minus the one-month T-bill rate for the corresponding period. Winsorized at 1% and 99%. Source: CRSP.                                                                                                                                                                                                                                                                                |
| $MW_{i,t}$                              | 2005-2020 | Expected excess return proxy proposed by Martin and Wagner (2019) ( $MW$ ). Derived as lower bounds for the conditional expected excess return from out-the-money options. Winsorized at 1% and 99%. Source: Vilkov (2020) based on Volatility Surface File of Ivy DB OptionMetrics.                                                                                                                             |
| $GLB_{i,t}$                             | 2005-2020 | Expected excess return proxy proposed by Chabi-Yo et al. (2022) ( $GLB$ ). Derived as the generalized lower bounds for the conditional expected excess return from out-the-money options. Winsorized at 1% and 99%. Source: Chabi-Yo et al. (2022) based on Volatility Surface File of Ivy DB OptionMetrics.                                                                                                     |
| <i>Betas for Factor Models</i>          |           |                                                                                                                                                                                                                                                                                                                                                                                                                  |
| $Market_{i,t}$                          | 2005-2020 | Market beta estimated for each month using daily excess returns and factor realizations over the past 12 months. Source: K. French's DataLibrary.                                                                                                                                                                                                                                                                |
| $Size (SMB)_{i,t}$                      | 2005-2020 | Size factor beta estimated for each month using daily excess returns and factor realizations over the past 12 months. Source: K. French's DataLibrary.                                                                                                                                                                                                                                                           |
| $Value (HML)_{i,t}$                     | 2005-2020 | Value factor beta estimated for each month using daily excess returns and factor realizations over the past 12 months. Source: K. French's DataLibrary.                                                                                                                                                                                                                                                          |
| $Momentum (WML)_{i,t}$                  | 2005-2020 | Momentum factor beta estimated for each month using daily excess returns and factor realizations over the past 12 months. Source: K. French's DataLibrary.                                                                                                                                                                                                                                                       |
| $Profitability (RMW)_{i,t}$             | 2005-2020 | Profitability factor beta estimated for each month using daily excess returns and factor realizations over the past 12 months. Source: K. French's DataLibrary.                                                                                                                                                                                                                                                  |
| $Investment (CMA)_{i,t}$                | 2005-2020 | Investment factor beta estimated for each month using daily excess returns and factor realizations over the past 12 months. Source: K. French's DataLibrary.                                                                                                                                                                                                                                                     |

| Variable                                                      | Years     | Definition                                                                                                                                                                                                                                                                                                                                                                                                                                                                                                                                                                |
|---------------------------------------------------------------|-----------|---------------------------------------------------------------------------------------------------------------------------------------------------------------------------------------------------------------------------------------------------------------------------------------------------------------------------------------------------------------------------------------------------------------------------------------------------------------------------------------------------------------------------------------------------------------------------|
| <i>Risk Quantities</i>                                        |           |                                                                                                                                                                                                                                                                                                                                                                                                                                                                                                                                                                           |
| $IV_{i,t}$                                                    | 2005-2020 | Implied variance calculated as the Martin (2017) variance swap rate from 30-day out-the-money options. Source: Volatility Surface File of Ivy DB OptionMetrics.                                                                                                                                                                                                                                                                                                                                                                                                           |
| $ISkew_{i,t}$                                                 | 2005-2020 | Implied skewness of log returns computed from 30-day out-the-money options following Bakshi et al. (2003). Winsorized at 1% and 99%. Source: Vilkov (2020) based on Volatility Surface File of Ivy DB OptionMetrics.                                                                                                                                                                                                                                                                                                                                                      |
| $IKurt_{i,t}$                                                 | 2005-2020 | Implied kurtosis of log returns computed from 30-day out-the-money options following Bakshi et al. (2003). Winsorized at 1% and 99%. Source: Vilkov (2020) based on Volatility Surface File of Ivy DB OptionMetrics.                                                                                                                                                                                                                                                                                                                                                      |
| $SlopeD_{i,t}$                                                | 2005-2020 | Steepness of the implied volatility slope on the left from the at-the-money (ATM) point. As in Kelly et al. (2016), the measure is the slope of functions relating implied volatilities of OTM options to their deltas. We estimate $SlopeD$ by regressing implied volatilities of puts with deltas between $-0.1$ and $-0.5$ on their deltas (and a constant). Winsorized at 1% and 99%. Source: Vilkov (2020) based on Volatility Surface File of Ivy DB OptionMetrics.                                                                                                 |
| $SlopeU_{i,t}$                                                | 2005-2020 | Steepness of the implied volatility slope on the right from the at-the-money (ATM) point. Similar to $SlopeD$ , the measure is the slope of functions relating implied volatilities of OTM options to their deltas. We estimate $SlopeU_{i,t}$ by regressing implied volatilities of calls with deltas between $0.1$ and $0.5$ on their deltas. We multiply the resulting number by minus one and take the resulting slope coefficient as the $SlopeU$ measure. Winsorized at 1% and 99%. Source: Vilkov (2020) based on Volatility Surface File of Ivy DB OptionMetrics. |
| <i>Fundamentals and Market Characteristics</i>                |           |                                                                                                                                                                                                                                                                                                                                                                                                                                                                                                                                                                           |
| $Market\ Cap_{i,t}$                                           | 2005-2020 | A stock's market capitalization. Source: CRSP.                                                                                                                                                                                                                                                                                                                                                                                                                                                                                                                            |
| $Assets_{i,t}$                                                | 2005-2020 | Total assets (Compustat item AT). Winsorized at 1% and 99%. Source: Compustat NA Annual.                                                                                                                                                                                                                                                                                                                                                                                                                                                                                  |
| $Debt/Assets_{i,t}$                                           | 2005-2020 | Sum of the book value of long-term debt (Compustat data item DLTT) and the book value of current liabilities (DLC) divided by total assets (Compustat data item AT). Winsorized at 1% and 99%. Source: Compustat NA Annual.                                                                                                                                                                                                                                                                                                                                               |
| $Cash/Assets_{i,t}$                                           | 2005-2020 | Cash and short-term investments (Compustat data item CHE) divided by total assets (Compustat data item AT). Winsorized at 1% and 99%. Source: Compustat NA Annual.                                                                                                                                                                                                                                                                                                                                                                                                        |
| $PP\&E/Assets_{i,t}$                                          | 2005-2020 | Property, plant, and equipment (Compustat data item PPENT) divided by total assets (Compustat data item AT). Winsorized at 1% and 99%. Source: Compustat NA Annual.                                                                                                                                                                                                                                                                                                                                                                                                       |
| $EBIT/Assets_{i,t}$                                           | 2005-2020 | Earnings before interest and taxes (Compustat data item EBIT) divided by total assets (Compustat data item AT). Winsorized at 1% and 99%. Source: Compustat NA Annual.                                                                                                                                                                                                                                                                                                                                                                                                    |
| $Capex/Assets_{i,t}$                                          | 2005-2020 | Capital expenditures divided by assets. Winsorized at 1% and 99%. Source: Compustat NA Annual.                                                                                                                                                                                                                                                                                                                                                                                                                                                                            |
| $R\&D/Assets_{i,t}$                                           | 2005-2020 | R&D expenditures (Compustat data item XRD) divided by total assets (Compustat data item AT). Missing values set to zero. Winsorized at 1% and 99%. Source: Compustat NA Annual.                                                                                                                                                                                                                                                                                                                                                                                           |
| $Volatility_{i,t}$                                            | 2005-2020 | Annualized volatility of stock $i$ from daily returns from month $t - 12$ to $t$ . Winsorized at 1% and 99%. Source: CRSP.                                                                                                                                                                                                                                                                                                                                                                                                                                                |
| $Momentum12_{i,t}$                                            | 2005-2020 | Cumulative return of stock $i$ from $t - 13$ to $t - 1$ estimated at the end of month $t$ . Winsorized at 1% and 99%. Source: CRSP.                                                                                                                                                                                                                                                                                                                                                                                                                                       |
| <i>CO<sub>2</sub>, Oil Exposure, and Carbon Risk Measures</i> |           |                                                                                                                                                                                                                                                                                                                                                                                                                                                                                                                                                                           |
| $Carbon\ Emissions_{i,t}$                                     | 2005-2020 | Sum of Scope 1 and Scope 2 emissions. We follow Bolton and Kacperczyk (2021a,b) in using emission levels. Scope 1 emissions are caused by the combustion of fossil fuels or from the release during manufacturing. Scope 2 emissions originate from the purchase of electricity, heating, or cooling. As this variable is available at the annual frequency, we use the emissions data from year $t - 1$ for all months in year $t$ . Winsorized at 1% and 99%. Source: S&P Global Trucost.                                                                               |
| $ISS\ Score_{i,t}$                                            | 2015-2019 | Carbon Risk Rating of ISS, assesses the carbon-related performance of firms and takes values between 1 (poor performance) and 4 (excellent performance). As this variable is available at the annual frequency, we merge with monthly returns data by stock-year for all months in a given year $t$ . Source: ISS (part of Deutsche Börse).                                                                                                                                                                                                                               |

| Variable                                                      | Years     | Definition                                                                                                                                                                                                                                                                                                                                                                                                                                                                                                                                                                                                                                                                                                                                                                                                                                                                                                                                                                                                                                                                                                                                                                                                                      |
|---------------------------------------------------------------|-----------|---------------------------------------------------------------------------------------------------------------------------------------------------------------------------------------------------------------------------------------------------------------------------------------------------------------------------------------------------------------------------------------------------------------------------------------------------------------------------------------------------------------------------------------------------------------------------------------------------------------------------------------------------------------------------------------------------------------------------------------------------------------------------------------------------------------------------------------------------------------------------------------------------------------------------------------------------------------------------------------------------------------------------------------------------------------------------------------------------------------------------------------------------------------------------------------------------------------------------------|
| <i>CO<sub>2</sub>, Oil Exposure, and Carbon Risk Measures</i> |           |                                                                                                                                                                                                                                                                                                                                                                                                                                                                                                                                                                                                                                                                                                                                                                                                                                                                                                                                                                                                                                                                                                                                                                                                                                 |
| <i>Sustainalytics Score<sub>i,t</sub></i>                     | 2013-2020 | Carbon Risk Rating of Sustainalytics, with a focus on firms' exposures and management of material carbon risks. As this variable is available at the variable frequency, we merge with monthly returns data by stock-month and fill forward for up to 12 months. Source: Sustainalytics (part of Morningstar).                                                                                                                                                                                                                                                                                                                                                                                                                                                                                                                                                                                                                                                                                                                                                                                                                                                                                                                  |
| <i>Oil Beta<sub>i,t</sub></i>                                 | 2005-2020 | Oil beta of the stock, estimated using daily excess returns and oil price (WTI spot) percentage changes over the past 12 months (jointly with the 6-factor model). Source: U.S. Energy Information Administration.                                                                                                                                                                                                                                                                                                                                                                                                                                                                                                                                                                                                                                                                                                                                                                                                                                                                                                                                                                                                              |
| <i>Institutional and Market Factors</i>                       |           |                                                                                                                                                                                                                                                                                                                                                                                                                                                                                                                                                                                                                                                                                                                                                                                                                                                                                                                                                                                                                                                                                                                                                                                                                                 |
| <i>Green Innovation<sub>t</sub></i>                           | 2005-2020 | Monthly total number of green patents filed in the U.S. in the previous three years according to the Google Patents database. To identify "green" patents, we follow the approach in Cohen et al. (2021) and apply the OECD classification to identify what constitutes a patent with the potential to address environmental problems. As this variable is available at the annual frequency, we propagate the same value for all observations in a given year. Source: Google Patents.                                                                                                                                                                                                                                                                                                                                                                                                                                                                                                                                                                                                                                                                                                                                         |
| <i>Adaptation<sub>t</sub></i>                                 | 2005-2020 | Monthly measure of the proportion of climate change exposure in the S&P 500 coming from states with adaptation plans. In a first step, we create the firm-level variable $\mathbf{1}^{Adapted\ State}$ , which equals one from a particular date if the firm's headquarters are located in a state adopting state-led climate change adaptation plans. Stocks are matched to states based on their headquarters location. In a second step, we construct monthly values of <i>Adaptation<sub>t</sub></i> by weighting <i>CCEXposure<sub>i,t</sub></i> with $\mathbf{1}^{Adapted\ State}$ .                                                                                                                                                                                                                                                                                                                                                                                                                                                                                                                                                                                                                                      |
|                                                               |           | $Adaptation_t = \frac{\sum_i \mathbf{1}_{i,t}^{Adapted\ State} \times CCEXposure_{i,t}}{\sum_i CCEXposure_{i,t}}$                                                                                                                                                                                                                                                                                                                                                                                                                                                                                                                                                                                                                                                                                                                                                                                                                                                                                                                                                                                                                                                                                                               |
| <i>ESG Fund Flows<sub>t</sub></i>                             | 2005-2020 | Source: Georgetown Climate Center.<br>Monthly net flow into ESG funds. We first obtain the list of sustainable funds from Morningstar's 2021 Sustainable Funds U.S. Landscape Report (Pastor et al. 2021), which contains funds tickers, inception dates, and repurpose dates (when a fund was repurposed as "sustainable"). We then match these sustainable funds with the CRSP Survivor-Bias-Free U.S. Mutual Funds by their tickers and inception dates. For funds that reposition themselves as sustainable funds, we use their "repurposed date" to match with the CRSP database. We calculate the net fund flows as the change in total net assets ( <i>TNA</i> ) minus appreciation (computed using reported fund's return $R_{j,t}$ ) during the month. We then aggregate this measure across all funds $j$ in month $t$ . Source: Morningstar's 2021 Sustainable Funds U.S. Landscape Report, CRSP Survivor-Bias-Free U.S. Mutual Funds.                                                                                                                                                                                                                                                                               |
| <i>Big Three IO<sub>t</sub></i>                               | 2005-2017 | Monthly climate change exposure of the Big Three (Vanguard, BlackRock, and StateStreet) in the S&P 500 relative to the climate change exposure held in the market. Computed each month $t$ as the <i>CCEXposure<sub>i,t</sub></i> -weighted holdings by the Big Three in S&P 500 stocks. First, we obtain data on Big Three holdings ( <i>Big Three<sub>i,t</sub></i> ) by using the quarterly stock ownership data from Schedule 13F filings compiled by Backus et al. (2021). The data has better coverage than Thomson Reuters. We follow Ben-David et al. (2021) and use the following Thomson-Reuters mgrno to identify Big Three holdings: Vanguard (90457), StateStreet (81540), BlackRock (9385, 11386, 39539, 56790, 91430, and 12588). Holdings are matched with monthly data by the end of the quarter and propagated forward using exponential smoothing (half-life of 3 months). Second, to obtain <i>CCEXposure<sub>i,t</sub></i> -weighted holdings each month, we multiply the Big Three's percentage holdings <i>Big Three<sub>i,t</sub></i> in stock $i$ at time $t$ by <i>CCEXposure<sub>i,t</sub></i> , sum the product across stocks, and divide the total by the sum of <i>CCEXposure<sub>i,t</sub></i> : |
|                                                               |           | $Big\ Three\ IO_t = \frac{\sum_i Big\ Three_{i,t} \times CCEXposure_{i,t}}{\sum_i CCEXposure_{i,t}}$                                                                                                                                                                                                                                                                                                                                                                                                                                                                                                                                                                                                                                                                                                                                                                                                                                                                                                                                                                                                                                                                                                                            |
| <i>Oil Price<sub>t</sub></i>                                  | 2005-2020 | Available from 01/2005 to 12/2017. Source: Backus et al. (2021).<br>Monthly WTI spot price, created as the average of daily WTI spot price prices. Source: U.S. Energy Information Administration.                                                                                                                                                                                                                                                                                                                                                                                                                                                                                                                                                                                                                                                                                                                                                                                                                                                                                                                                                                                                                              |
| <i>CO<sub>2</sub> Price<sub>t</sub></i>                       | 2005-2020 | Monthly futures price of CO <sub>2</sub> emission allowances. Available from 08/2005 to 12/2020 based on front-month data. Source: EU Emission Trading System.                                                                                                                                                                                                                                                                                                                                                                                                                                                                                                                                                                                                                                                                                                                                                                                                                                                                                                                                                                                                                                                                  |

| Bigram               | Frequency | Bigram                  | Frequency | Bigram                 | Frequency |
|----------------------|-----------|-------------------------|-----------|------------------------|-----------|
| renewable energy     | 15605     | onshore wind            | 878       | carbon intensity       | 641       |
| electric vehicle     | 9508      | electric motor          | 869       | energy application     | 615       |
| clean energy         | 6430      | provide energy          | 851       | produce electricity    | 604       |
| new energy           | 4544      | efficient solution      | 839       | help state             | 604       |
| climate change       | 4374      | global warm             | 837       | environmental standard | 593       |
| wind power           | 4253      | power generator         | 828       | power agreement        | 586       |
| wind energy          | 4035      | solar pv                | 827       | supply energy          | 585       |
| energy efficient     | 3899      | scale solar             | 827       | electric hybrid        | 585       |
| greenhouse gas       | 3416      | need clean              | 821       | source power           | 575       |
| solar energy         | 2511      | coastal area            | 816       | sustainability goal    | 572       |
| air quality          | 2409      | energy star             | 793       | energy reform          | 571       |
| clean air            | 2301      | environmental footprint | 792       | plant power            | 564       |
| carbon emission      | 2088      | design use              | 777       | compare conventional   | 560       |
| gas emission         | 1910      | area energy             | 777       | gas vehicle            | 560       |
| extreme weather      | 1773      | charge station          | 762       | effort energy          | 560       |
| carbon dioxide       | 1583      | clean water             | 759       | pass house             | 559       |
| water resource       | 1423      | major design            | 747       | carbon free            | 558       |
| autonomous vehicle   | 1394      | vehicle manufacturer    | 740       | driver assistance      | 545       |
| energy environment   | 1279      | future energy           | 737       | electrical energy      | 543       |
| wind resource        | 1245      | motor control           | 726       | solar installation     | 541       |
| government india     | 1201      | combine heat            | 718       | snow ice               | 538       |
| battery power        | 1147      | electric bus            | 709       | renewable natural      | 536       |
| air pollution        | 1127      | distribute power        | 703       | promote use            | 536       |
| battery electric     | 1121      | environmental benefit   | 695       | farm project           | 531       |
| integrate resource   | 1052      | eco friendly            | 695       | laser diode            | 528       |
| clean power          | 1008      | electrical vehicle      | 695       | deliver energy         | 526       |
| carbon price         | 999       | carbon neutral          | 690       | protect environment    | 525       |
| world population     | 977       | fast charge             | 675       | sustainable energy     | 523       |
| solar farm           | 971       | cell power              | 657       | manage energy          | 522       |
| energy regulatory    | 967       | energy team             | 650       | invest energy          | 521       |
| obama administration | 957       | cycle gas               | 646       | electric energy        | 519       |
| heat power           | 941       | coal gasification       | 643       | forest land            | 512       |
| carbon tax           | 928       | environmental concern   | 643       | capacity energy        | 512       |
| unite nation         | 925       |                         |           |                        |           |

**OA Table 1: Top-100 Bigrams Captured by Climate Change Exposure (*CCExposure*).**

This table reports the top-100 bigrams associated with *CCExposure*, which measures the relative frequency with which bigrams related to climate change occur in the transcripts of earnings calls. The bigrams are based on the global sample that includes 86,152 firm-year observations from 10,673 firms headquartered in 34 countries (see Sautner et al. (2022) for details).

|                                                    | $CCE_{i,t}$ | $CCE_{i,t}^{Opp}$ | $CCE_{i,t}^{Reg}$ | $CCE_{i,t}^{Phy}$ | $RET_{i,t}$ | $MW_{i,t}$ | $GLB_{i,t}$ |
|----------------------------------------------------|-------------|-------------------|-------------------|-------------------|-------------|------------|-------------|
| Panel A: Climate Change Exposure Measures          |             |                   |                   |                   |             |            |             |
| $CCE_{i,t}$                                        | 1.000       | 0.913             | 0.725             | 0.111             | -0.002      | -0.026     | -0.000      |
| $CCE_{i,t}^{Ind}$                                  | 0.721       | 0.647             | 0.541             | 0.095             | -0.005      | -0.040     | -0.007      |
| $CCE_{i,t}^{Res}$                                  | 0.693       | 0.645             | 0.483             | 0.062             | 0.002       | 0.003      | 0.006       |
| $CCE_{i,t}^{Opp}$                                  | 0.913       | 1.000             | 0.578             | 0.051             | 0.000       | -0.013     | 0.000       |
| $CCE_{i,t}^{Reg}$                                  | 0.725       | 0.578             | 1.000             | 0.082             | -0.005      | -0.020     | 0.012       |
| $CCE_{i,t}^{Phy}$                                  | 0.111       | 0.051             | 0.082             | 1.000             | -0.004      | -0.018     | -0.009      |
| $CCE_{i,t}^{Ltg}$                                  | 0.153       | 0.135             | 0.142             | 0.008             | 0.001       | -0.009     | -0.005      |
| $CCSentiment_{i,t}^{Neg}$                          | 0.817       | 0.720             | 0.600             | 0.130             | -0.002      | -0.006     | 0.015       |
| Panel B: Expected Excess Return Proxies            |             |                   |                   |                   |             |            |             |
| $RET_{i,t}$ , (p.a.)                               | -0.002      | 0.000             | -0.005            | -0.004            | 1.000       | 0.049      | 0.069       |
| $MW_{i,t}$ , (p.a.)                                | -0.026      | -0.013            | -0.020            | -0.018            | 0.049       | 1.000      | 0.791       |
| $GLB_{i,t}$ , (p.a.)                               | -0.000      | 0.000             | 0.012             | -0.009            | 0.069       | 0.791      | 1.000       |
| Panel C: Betas for Factor Models                   |             |                   |                   |                   |             |            |             |
| $Market_{i,t}$                                     | -0.118      | -0.105            | -0.098            | -0.014            | 0.000       | 0.220      | 0.132       |
| $Size (SMB)_{i,t}$                                 | -0.102      | -0.082            | -0.105            | -0.006            | 0.031       | 0.324      | 0.150       |
| $Value (HML)_{i,t}$                                | -0.002      | -0.016            | 0.018             | 0.014             | 0.001       | 0.092      | 0.099       |
| $Momentum (WML)_{i,t}$                             | 0.038       | 0.025             | 0.033             | 0.011             | 0.015       | -0.215     | -0.103      |
| $Profitability (RMW)_{i,t}$                        | 0.049       | 0.031             | 0.044             | 0.013             | 0.016       | -0.072     | 0.001       |
| $Investment (CMA)_{i,t}$                           | 0.063       | 0.059             | 0.046             | 0.015             | -0.023      | -0.117     | -0.107      |
| Panel D: Risk Quantities                           |             |                   |                   |                   |             |            |             |
| $IV_{i,t}$                                         | -0.028      | -0.014            | -0.021            | -0.018            | -0.086      | 0.903      | 0.684       |
| $ISkew_{i,t}$                                      | -0.057      | -0.052            | -0.039            | -0.012            | -0.122      | 0.121      | -0.052      |
| $IKurt_{i,t}$                                      | 0.154       | 0.142             | 0.101             | 0.028             | 0.037       | -0.192     | -0.074      |
| $SlopeU_{i,t}$                                     | 0.120       | 0.115             | 0.075             | 0.022             | -0.042      | -0.011     | 0.003       |
| $SlopeD_{i,t}$                                     | 0.095       | 0.094             | 0.059             | 0.015             | 0.025       | 0.217      | 0.313       |
| Panel E: Fundamentals and Market Characteristics   |             |                   |                   |                   |             |            |             |
| $Log(Market Cap)_{i,t}$                            | 0.007       | 0.008             | 0.036             | -0.015            | -0.031      | -0.321     | -0.137      |
| $Log(Assets)$                                      | 0.096       | 0.082             | 0.112             | 0.005             | -0.027      | -0.170     | -0.062      |
| $Debt/Assets_{i,t}$                                | 0.080       | 0.067             | 0.065             | 0.025             | 0.001       | 0.044      | 0.005       |
| $Cash/Assets_{i,t}$                                | -0.152      | -0.113            | -0.131            | -0.060            | 0.020       | 0.070      | -0.017      |
| $PP\&E/Assets_{i,t}$                               | 0.365       | 0.300             | 0.294             | 0.058             | -0.005      | 0.014      | -0.030      |
| $EBIT/Assets_{i,t}$                                | -0.106      | -0.095            | -0.086            | -0.020            | -0.004      | -0.195     | -0.065      |
| $Capex/Assets_{i,t}$                               | 0.157       | 0.137             | 0.117             | -0.004            | 0.000       | 0.056      | -0.007      |
| $R\&D/Assets_{i,t}$                                | -0.088      | -0.054            | -0.087            | -0.053            | 0.021       | 0.073      | 0.001       |
| $Volatility_{i,t}$                                 | -0.083      | -0.058            | -0.072            | -0.040            | 0.064       | 0.630      | 0.396       |
| $Momentum12_{i,t}$                                 | -0.006      | -0.005            | -0.019            | 0.001             | -0.002      | -0.251     | -0.316      |
| Panel F: CO <sub>2</sub> and Oil Exposure Measures |             |                   |                   |                   |             |            |             |
| $Log(Carbon Emissions)_{i,t}$                      | 0.401       | 0.341             | 0.335             | 0.025             | -0.021      | -0.124     | -0.095      |
| $Oil Beta_{i,t}$                                   | 0.039       | 0.023             | 0.034             | 0.002             | -0.007      | 0.044      | 0.011       |

**OA Table 2: Correlations to Climate Exposure Measures.**

This table reports unconditional correlations between selected variables at the stock-month level. The sample covers the period from 01/2005 to 12/2020 and includes S&P 500 stocks.

| Expected Excess Return      | $RET_{i,t}$        |                    |                    | $MW_{i,t}$         |                    |                    | $GLB_{i,t}$        |                    |                    |
|-----------------------------|--------------------|--------------------|--------------------|--------------------|--------------------|--------------------|--------------------|--------------------|--------------------|
|                             | (1)                | (2)                | (3)                | (4)                | (5)                | (6)                | (7)                | (8)                | (9)                |
| $Market_{i,t}$              | -0.025<br>(-0.382) | -0.005<br>(-0.069) | -0.001<br>(-0.018) | -0.001<br>(-0.399) | 0.008<br>(2.863)   | 0.009<br>(3.295)   | 0.033<br>(6.790)   | 0.037<br>(8.366)   | 0.037<br>(8.373)   |
| $Size (SMB)_{i,t}$          | 0.014<br>(0.491)   | -0.009<br>(-0.344) | -0.002<br>(-0.066) | 0.019<br>(10.510)  | 0.015<br>(6.761)   | 0.015<br>(6.701)   | -0.001<br>(-0.633) | 0.000<br>(0.188)   | 0.001<br>(0.211)   |
| $Value (HML)_{i,t}$         | -0.021<br>(-0.509) | -0.025<br>(-0.545) | -0.022<br>(-0.499) | -0.007<br>(-4.407) | -0.011<br>(-6.802) | -0.010<br>(-6.371) | 0.001<br>(0.563)   | -0.001<br>(-0.372) | -0.001<br>(-0.408) |
| $Momentum (WML)_{i,t}$      | -0.018<br>(-0.349) | -0.010<br>(-0.196) | -0.015<br>(-0.299) | -0.008<br>(-1.770) | -0.006<br>(-1.709) | -0.007<br>(-1.835) | -0.001<br>(-0.169) | 0.000<br>(0.090)   | 0.000<br>(0.037)   |
| $Profitability (RMW)_{i,t}$ | 0.018<br>(0.748)   | 0.023<br>(1.064)   | 0.021<br>(0.972)   | -0.004<br>(-3.687) | -0.004<br>(-3.698) | -0.004<br>(-3.785) | -0.005<br>(-5.571) | -0.004<br>(-5.924) | -0.004<br>(-5.951) |
| $Investment (CMA)_{i,t}$    | -0.035<br>(-1.333) | -0.033<br>(-1.250) | -0.033<br>(-1.256) | -0.002<br>(-1.532) | -0.004<br>(-2.098) | -0.003<br>(-2.033) | -0.006<br>(-4.907) | -0.005<br>(-3.792) | -0.005<br>(-3.766) |
| $CCExposure_{i,t}$          | 1.183<br>(1.556)   | -<br>(-)           | 0.928<br>(1.337)   | 0.105<br>(1.998)   | -<br>(-)           | 0.119<br>(2.901)   | -0.037<br>(-1.212) | -<br>(-)           | 0.011<br>(0.427)   |
| $ISS Score_{i,t}$           | -<br>(-)           | 0.815<br>(1.080)   | 0.801<br>(1.069)   | -<br>(-)           | 0.018<br>(0.321)   | 0.016<br>(0.296)   | -<br>(-)           | -0.034<br>(-1.126) | -0.034<br>(-1.144) |
| Controls                    | Yes                |
| Sample Period               | 01/2015-12/2019    |                    |                    |                    |                    |                    |                    |                    |                    |
| Obs.                        | 29044              | 26040              | 26040              | 28969              | 26039              | 26039              | 28969              | 26039              | 26039              |
| $R^2$                       | 0.003              | 0.003              | 0.003              | 0.445              | 0.413              | 0.414              | 0.101              | 0.106              | 0.106              |

**OA Table 3: Risk Premium for ISS Carbon Risk Rating: Unconditional Evidence for 2015-2019.** This table reports results of Fama-MacBeth regressions at the stock-month level for the years from 2015 to 2019. We report the risk premium estimates for the ISS Carbon Risk Rating ( $ISS Score$ ) and for firm-specific climate change exposure ( $CCExposure$ ). All climate change exposure risk premiums are in % p.a. after controlling for a 6-factor model (combination of 4- and 5-factor models) (in decimals p.a.) and stock characteristics (described in Section 3.2). As proxies for expected excess returns, we use the realized excess returns ( $RET$ ), the forward-looking proxy by Martin and Wagner (2019) ( $MW$ ), and the forward-looking proxy by Chabi-Yo et al. (2022) ( $GLB$ ). All explanatory variables (except for the factor betas) are normalized at each point in time to have a standard deviation of 0.01.  $t$ -statistics based on Newey and West (1987) standard errors with three lags are reported in parentheses. The sample covers the period from 01/2015 to 12/2019 and includes S&P 500 stocks.

| Expected Excess Return       | $RET_{i,t}$        |                    |                    | $MW_{i,t}$         |                    |                    | $GLB_{i,t}$        |                    |                    |
|------------------------------|--------------------|--------------------|--------------------|--------------------|--------------------|--------------------|--------------------|--------------------|--------------------|
|                              | (1)                | (2)                | (3)                | (4)                | (5)                | (6)                | (7)                | (8)                | (9)                |
| $Market_{i,t}$               | -0.032<br>(-0.625) | -0.038<br>(-0.716) | -0.039<br>(-0.762) | -0.000<br>(-0.195) | 0.006<br>(2.461)   | 0.007<br>(2.981)   | 0.035<br>(6.621)   | 0.034<br>(6.756)   | 0.034<br>(7.381)   |
| $Size (SMB)_{i,t}$           | 0.023<br>(1.011)   | 0.028<br>(1.410)   | 0.032<br>(1.629)   | 0.018<br>(11.086)  | 0.009<br>(5.643)   | 0.009<br>(6.167)   | 0.001<br>(0.569)   | 0.002<br>(1.428)   | 0.003<br>(1.589)   |
| $Value (HML)_{i,t}$          | -0.020<br>(-0.678) | -0.018<br>(-0.582) | -0.016<br>(-0.509) | -0.003<br>(-1.002) | -0.003<br>(-0.832) | -0.002<br>(-0.712) | 0.003<br>(1.163)   | 0.002<br>(0.768)   | 0.003<br>(0.943)   |
| $Momentum (WML)_{i,t}$       | 0.004<br>(0.103)   | -0.006<br>(-0.171) | -0.012<br>(-0.332) | -0.010<br>(-2.148) | -0.008<br>(-1.617) | -0.008<br>(-1.645) | -0.002<br>(-0.762) | -0.004<br>(-0.980) | -0.004<br>(-0.979) |
| $Profitability (RMW)_{i,t}$  | 0.022<br>(1.125)   | 0.029<br>(1.638)   | 0.028<br>(1.593)   | -0.003<br>(-2.337) | -0.003<br>(-3.276) | -0.004<br>(-3.414) | -0.001<br>(-0.473) | -0.000<br>(-0.230) | -0.000<br>(-0.201) |
| $Investment (CMA)_{i,t}$     | -0.024<br>(-1.384) | -0.020<br>(-1.127) | -0.019<br>(-1.115) | -0.002<br>(-1.811) | -0.004<br>(-3.591) | -0.004<br>(-3.407) | -0.005<br>(-5.487) | -0.005<br>(-5.424) | -0.005<br>(-5.259) |
| $CCExposure_{i,t}$           | 0.932<br>(1.498)   | -<br>(-)           | 0.309<br>(0.551)   | 0.144<br>(3.060)   | -<br>(-)           | 0.183<br>(4.280)   | 0.188<br>(2.185)   | -<br>(-)           | 0.221<br>(2.522)   |
| $Sustainalytics Score_{i,t}$ | -<br>(-)           | -1.196<br>(-1.791) | -1.222<br>(-1.807) | -<br>(-)           | -0.182<br>(-2.790) | -0.189<br>(-2.873) | -<br>(-)           | -0.049<br>(-0.995) | -0.059<br>(-1.155) |
| Controls                     | Yes                |
| Sample Period                | 01/2013-12/2020    |                    |                    |                    |                    |                    |                    |                    |                    |
| Obs.                         | 45605              | 40552              | 40552              | 45477              | 40552              | 40552              | 45477              | 40552              | 40552              |
| $R^2$                        | 0.004              | 0.004              | 0.004              | 0.334              | 0.237              | 0.235              | 0.077              | 0.073              | 0.071              |

**OA Table 4: Risk Premium for Sustainalytics Carbon Risk Rating: Unconditional Evidence for 2013-2020.**

This table reports results of Fama-MacBeth regressions at the stock-month level for the years from 2013 to 2020. We report the risk premiums for the Carbon Risk Rating from Sustainalytics ( $SustainalyticsScore$ ) and for firm-specific climate change exposure ( $CCExposure$ ). All climate change exposure risk premiums are in % p.a. after controlling for a 6-factor model (combination of 4- and 5-factor models) (in decimals p.a.) and stock characteristics (described in Section 3.2). As proxies for expected excess returns, we use the realized excess returns ( $RET$ ), the forward-looking proxy by Martin and Wagner (2019) ( $MW$ ), and the forward-looking proxy by Chabi-Yo et al. (2022) ( $GLB$ ). All explanatory variables (except for the factor betas) are normalized at each point in time to have standard deviations of 0.01.  $t$ -statistics based on Newey and West (1987) standard errors with three lags are reported in parentheses. The sample covers the period from 01/2013 to 12/2020 and includes S&P 500 stocks.

| Expected Excess Return        | $RET_{i,t}$        |                    | $MW_{i,t}$         |                    | $GLB_{i,t}$        |                    |
|-------------------------------|--------------------|--------------------|--------------------|--------------------|--------------------|--------------------|
|                               | (1)                | (2)                | (3)                | (4)                | (5)                | (6)                |
| $Market_{i,t}$                | -0.035<br>(-0.987) | -0.035<br>(-0.955) | 0.013<br>(3.294)   | 0.013<br>(3.327)   | 0.043<br>(8.623)   | 0.044<br>(8.607)   |
| $Size (SMB)_{i,t}$            | 0.028<br>(1.474)   | 0.027<br>(1.464)   | 0.014<br>(10.169)  | 0.014<br>(10.078)  | 0.007<br>(4.389)   | 0.007<br>(4.394)   |
| $Value (HML)_{i,t}$           | -0.014<br>(-0.696) | -0.015<br>(-0.747) | 0.004<br>(1.785)   | 0.004<br>(1.780)   | 0.005<br>(3.245)   | 0.005<br>(3.256)   |
| $Momentum (WML)_{i,t}$        | 0.010<br>(0.382)   | 0.013<br>(0.493)   | -0.013<br>(-3.049) | -0.012<br>(-3.030) | -0.009<br>(-2.342) | -0.009<br>(-2.304) |
| $Profitability (RMW)_{i,t}$   | 0.021<br>(1.626)   | 0.021<br>(1.609)   | -0.005<br>(-4.640) | -0.005<br>(-4.713) | -0.003<br>(-1.915) | -0.003<br>(-1.975) |
| $Investment (CMA)_{i,t}$      | -0.009<br>(-0.779) | -0.009<br>(-0.791) | -0.002<br>(-2.117) | -0.002<br>(-2.078) | -0.002<br>(-2.362) | -0.002<br>(-2.172) |
| $CCSentiment_{i,t}^{Neg}$     | 0.208<br>(0.485)   | –<br>–             | 0.085<br>(2.601)   | –<br>–             | 0.102<br>(2.128)   | –<br>–             |
| $CCSentiment_{i,t}^{Neg,Ind}$ | –<br>–             | -0.046<br>(-0.074) | –<br>–             | 0.049<br>(1.489)   | –<br>–             | 0.106<br>(2.303)   |
| $CCSentiment_{i,t}^{Neg,Res}$ | –<br>–             | 0.273<br>(0.928)   | –<br>–             | 0.072<br>(2.693)   | –<br>–             | 0.061<br>(1.648)   |
| Controls                      | Yes                | Yes                | Yes                | Yes                | Yes                | Yes                |
| Sample Period                 | 01/2005-12/2020    |                    |                    |                    |                    |                    |
| Obs.                          | 83114              | 83114              | 82653              | 82653              | 82653              | 82653              |
| $R^2$                         | 0.001              | 0.001              | 0.302              | 0.302              | 0.067              | 0.067              |

**OA Table 5: Risk Premium for Negative Climate Change Sentiment: Unconditional Evidence.**

This table reports the results of Fama-MacBeth regressions at the stock-month level. We report the risk premium estimates for negative climate change sentiment ( $CCSentiment^{Neg}$ ) and for the measure's two components, industry average negative climate change sentiment ( $CCSentiment^{Neg,Ind}$ ) and the residual ( $CCSentiment^{Neg,Res}$ ). All negative climate change sentiment risk premiums are in % p.a. after controlling for a 6-factor model (combination of 4- and 5-factor models) (in decimals p.a.) and stock characteristics (described in Section 3.2). As proxies for expected excess returns, we use the realized excess returns ( $RET$ ), the forward-looking proxy by Martin and Wagner (2019) ( $MW$ ), and the forward-looking proxy by Chabi-Yo et al. (2022) ( $GLB$ ). All explanatory variables (except for the factor betas) are normalized at each point in time to have standard deviations of 0.01.  $t$ -statistics based on Newey and West (1987) standard errors with three lags are reported in parentheses. The sample covers the period from 01/2005 to 12/2020 and includes S&P 500 stocks.

| Expected Excess Return            | $RET_{i,t}$        |                    | $MW_{i,t}$         |                    | $GLB_{i,t}$        |                    |
|-----------------------------------|--------------------|--------------------|--------------------|--------------------|--------------------|--------------------|
|                                   | (1)                | (2)                | (3)                | (4)                | (5)                | (6)                |
| $Market_{i,t}$                    | -0.035<br>(-0.967) | -0.035<br>(-0.954) | 0.013<br>(3.345)   | 0.014<br>(3.375)   | 0.044<br>(8.749)   | 0.044<br>(8.678)   |
| $Size (SMB)_{i,t}$                | 0.029<br>(1.553)   | 0.028<br>(1.506)   | 0.014<br>(10.190)  | 0.014<br>(10.037)  | 0.007<br>(4.466)   | 0.007<br>(4.426)   |
| $Value (HML)_{i,t}$               | -0.014<br>(-0.679) | -0.015<br>(-0.729) | 0.004<br>(1.808)   | 0.004<br>(1.801)   | 0.005<br>(3.279)   | 0.005<br>(3.271)   |
| $Momentum (WML)_{i,t}$            | 0.009<br>(0.335)   | 0.012<br>(0.447)   | -0.013<br>(-3.040) | -0.012<br>(-3.016) | -0.009<br>(-2.318) | -0.009<br>(-2.288) |
| $Profitability (RMW)_{i,t}$       | 0.021<br>(1.597)   | 0.020<br>(1.570)   | -0.005<br>(-4.685) | -0.005<br>(-4.749) | -0.003<br>(-1.885) | -0.003<br>(-1.960) |
| $Investment (CMA)_{i,t}$          | -0.009<br>(-0.749) | -0.009<br>(-0.775) | -0.002<br>(-2.027) | -0.002<br>(-2.047) | -0.002<br>(-2.165) | -0.002<br>(-2.128) |
| $Log(1 + CCExposure)_{i,t}$       | 0.469<br>(1.004)   | -                  | 0.092<br>(2.869)   | -                  | 0.178<br>(3.112)   | -                  |
| $Log(1 + CCExposure)_{i,t}^{Ind}$ | -                  | -0.048<br>(-0.080) | -                  | 0.042<br>(1.188)   | -                  | 0.096<br>(2.127)   |
| $Log(1 + CCExposure)_{i,t}^{Res}$ | -                  | 0.578<br>(1.898)   | -                  | 0.081<br>(3.171)   | -                  | 0.145<br>(3.462)   |
| Controls                          | Yes                | Yes                | Yes                | Yes                | Yes                | Yes                |
| Sample Period                     | 01/2005-12/2020    |                    |                    |                    |                    |                    |
| Obs.                              | 83114              | 83114              | 82653              | 82653              | 82653              | 82653              |
| $R^2$                             | 0.001              | 0.001              | 0.302              | 0.302              | 0.067              | 0.067              |

**OA Table 6: Risk Premium for the Log of Climate Change Exposure: Unconditional Evidence.**

This table reports the results of the Fama-MacBeth regressions at the stock-month level. We report the risk premium estimates for the log of the firm-specific climate change exposure ( $Log(1 + CCExposure)$ ) and for the exposure measure's two components, industry average climate change exposure ( $Log(1 + CCExposure)^{Ind}$ ) and the residual ( $Log(1 + CCExposure)^{Res}$ ). All climate change exposure risk premiums are in % p.a. after controlling for a 6-factor model (combination of 4- and 5-factor models) (in decimals p.a.) and stock characteristics (described in Section 3.2). As proxies for expected excess returns, we use the realized excess returns ( $RET$ ), the forward-looking proxy by Martin and Wagner (2019) ( $MW$ ), and the forward-looking proxy by Chabi-Yo et al. (2022) ( $GLB$ ). All explanatory variables (except for the factor betas) are normalized at each point in time to have standard deviations of 0.01.  $t$ -statistics based on Newey and West (1987) standard errors with three lags are reported in parentheses. The sample covers the period from 01/2005 to 12/2020 and includes S&P 500 stocks.

| Panel A: Overall Variation    | $CCExposure_{i,t}$ |                            |                            |                      |
|-------------------------------|--------------------|----------------------------|----------------------------|----------------------|
|                               | (1)                | (2)                        | (3)                        | (4)                  |
| $CCExposure_{i,t-1}$          | 0.958<br>(238.06)  | 1.030<br>(170.71)          | 1.026<br>(165.82)          | 0.989<br>(220.14)    |
| Model                         | OLS                | IV                         | IV                         | IV                   |
| Instrument                    |                    | $CCExposure_{i,t-1}^{10K}$ | $CCExposure_{i,t-2}^{10K}$ | $CCExposure_{i,t-2}$ |
| Industry x Year Fixed Effects | No                 | No                         | No                         | No                   |
| Obs.                          | 9938               | 9938                       | 9169                       | 9169                 |
| Implied Share M.E.            |                    | 0.070<br>(0.010)           | 0.062<br>(0.015)           | 0.026<br>(0.008)     |
| Panel B: Firm-level Variation | $CCExposure_{i,t}$ |                            |                            |                      |
|                               | (1)                | (2)                        | (3)                        | (4)                  |
| $CCExposure_{i,t-1}$          | 0.896<br>(159.57)  | 1.028<br>(85.34)           | 1.023<br>(83.64)           | 0.951<br>(141.86)    |
| Model                         | OLS                | IV                         | IV                         | IV                   |
| Instrument                    |                    | $CCExposure_{i,t-1}^{10K}$ | $CCExposure_{i,t-2}^{10K}$ | $CCExposure_{i,t-2}$ |
| Industry x Year Fixed Effects | Yes                | Yes                        | Yes                        | Yes                  |
| Obs.                          | 9742               | 9742                       | 8981                       | 8981                 |
| Implied Share M.E.            |                    | 0.128<br>(0.003)           | 0.118<br>(0.033)           | 0.052<br>(0.015)     |

**OA Table 7: Measurement Error in Climate Change Exposure**

This table quantifies the measurement error in  $CCExposure$  in our sample following SvLVZ. The table consists of AR(1) regressions of  $CCExposure_{i,t}$  estimated at the annual level.  $CCExposure_{i,t}$  is constructed at annual level by averaging the values of the four earnings calls during the year. In this table, we use unsmoothed measures of  $CCExposure$ .  $CCExposure^{10K}$  measures climate change exposure by applying the SvLVZ algorithm to the “Management Discussion and Analysis” (MD&A) section in firms’ annual 10K filings. Column (1) reports the OLS estimate of the AR(1) regression  $CCExposure_{i,t} = \alpha + \beta CCExposure_{i,t-1} + \epsilon$ . In Columns (2) to (4), we estimated the AR(1) regression with different instruments using the same specification. The implied share of the measurement error in Columns 2 to 4 is calculated as  $1 - (\hat{\beta}_{OLS}/\hat{\beta}_{IV})$ . We standardized the exposure variables by demeaning and dividing by the standard deviation. We report  $t$ -statistics for the regression results and bootstrapped standard errors for the estimated implied share of measurement errors. The standard errors of the implied share of measurement error is bootstrapped with 500 repeats.

| Expected Excess Return      | $RET_{i,t}$        | $MW_{i,t}$         | $GLB_{i,t}$        |
|-----------------------------|--------------------|--------------------|--------------------|
|                             | (1)                | (2)                | (3)                |
| $Market_{i,t}$              | -0.031<br>(-0.710) | 0.012<br>(2.411)   | 0.046<br>(7.728)   |
| $Size (SMB)_{i,t}$          | 0.021<br>(1.124)   | 0.015<br>(10.349)  | 0.007<br>(3.456)   |
| $Value (HML)_{i,t}$         | -0.011<br>(-0.453) | 0.005<br>(1.699)   | 0.007<br>(3.373)   |
| $Momentum (WML)_{i,t}$      | 0.003<br>(0.084)   | -0.016<br>(-3.391) | -0.012<br>(-2.598) |
| $Profitability (RMW)_{i,t}$ | 0.023<br>(1.553)   | -0.006<br>(-4.285) | -0.003<br>(-1.866) |
| $Investment (CMA)_{i,t}$    | -0.006<br>(-0.414) | -0.002<br>(-1.995) | -0.002<br>(-2.331) |
| $CCExposure_{i,t}^{Ltg}$    | 0.050<br>(0.160)   | 0.022<br>(1.162)   | 0.001<br>(0.064)   |
| Controls                    | Yes                | Yes                | Yes                |
| Sample Period               | 01/2005-12/2020    |                    |                    |
| Obs.                        | 69745              | 69497              | 69497              |
| $R^2$                       | 0.001              | 0.320              | 0.090              |

**OA Table 8: Risk Premium for Climate Change Litigation Exposure: Unconditional Evidence.**

This table reports the results of the Fama-MacBeth regressions at the stock-month level. We report the risk premium estimates for firm-specific climate change exposure related to litigation ( $CCExposure^{Ltg}$ ). The litigation keywords used to construct  $CCExposure^{Ltg}$  are litigation, lawsuit, legal case, prosecution, indictment, law enforcement, legal investigation, legal action, legal dispute, class action, bringing of charges, legal proceeding, suit at law, judicial proceeding, legal contest, legal process, trial, impeachment, allegation, arraignment, and sued. We created this list by searching for synonyms for the words litigation and lawsuit. All climate change exposure risk premiums are in % p.a. after controlling for a 6-factor model (combination of 4- and 5-factor models) (in decimals p.a.) and stock characteristics (described in Section 3.2). As proxies for expected excess returns, we use the realized excess returns ( $RET$ ), the forward-looking proxy by Martin and Wagner (2019) ( $MW$ ), and the forward-looking proxy by Chabi-Yo et al. (2022) ( $GLB$ ). All explanatory variables (except for the factor betas) are normalized at each point in time to have standard deviations of 0.01.  $t$ -statistics based on Newey and West (1987) standard errors with three lags are reported in parentheses. The sample covers the period from 01/2008 to 12/2020 and includes S&P 500 stocks.

|                                         | 2005-2010 | 2011-2014 | 2015-2020 |
|-----------------------------------------|-----------|-----------|-----------|
|                                         | (1)       | (2)       | (3)       |
| <i>Green Innovation<sub>t</sub></i>     | 0.014     | 0.020     | 0.030     |
| <i>Adaptation<sub>t</sub></i>           | 0.004     | 0.021     | 0.024     |
| <i>ESG Fund Flows<sub>t</sub></i>       | 0.000     | -0.001    | 0.007     |
| <i>Oil Price<sub>t</sub></i>            | 0.032     | 0.042     | 0.023     |
| <i>CO<sub>2</sub> Price<sub>t</sub></i> | 0.020     | 0.010     | 0.018     |
| <i>Big Three IO<sub>t</sub></i>         | 0.000     | -0.008    | 0.013     |

**OA Table 9: Institutional and Market Factors over Time.**

This table reports mean values of institutional and market factors across for three different subperiods: (i) 01/2005-12/2010 in Column 1; (ii) 01/2011-12/2014 in Columns 2; and (iii) 01/2015-12/2020 in Column 3. All variables are normalized to have a standard deviation of 0.01 for the full sample period. *CO<sub>2</sub> Price<sub>t</sub>* start in 08/2005, and *Big Three IO<sub>t</sub>* goes until 12/2017. The sample includes S&P 500 stocks.

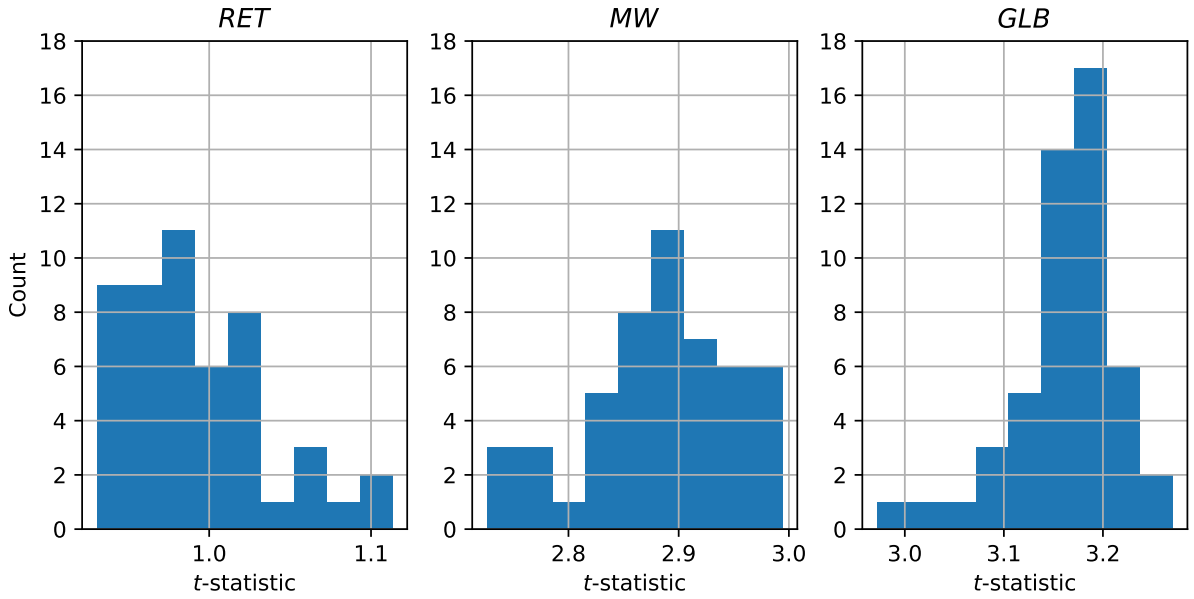

**OA Figure 1: Risk Premium for Climate Change Exposure: Histograms for Perturbation  $t$ -statistics.**

This figure shows histograms of the  $t$ -statistics for the risk premium for  $CCExposure$ , obtained separately for 50 perturbed  $CCExposure$  measures. The risk premium is estimated using three proxies for the expected excess return: the realized excess returns ( $RET$ ), the forward-looking proxy by Martin and Wagner (2019) ( $MW$ ), and the forward-looking proxy by Chabi-Yo et al. (2022) ( $GLB$ ). Risk premiums are estimated jointly with the 6-factor model (4- and 5-factor models combined) premiums and stock characteristics (described in Section 3.2).  $t$ -statistics are based on Newey and West (1987) standard errors with three lags. The sample covers the period from 01/2005 to 12/2020 and includes S&P 500 stocks.

## References

- Backus M, Conlon C, Sinkinson M (2021) Common ownership in america: 1980–2017. *American Economic Journal: Microeconomics* 13(3):273–308.
- Bakshi GS, Kapadia N, Madan DB (2003) Stock return characteristics, skew laws, and the differential pricing of individual equity options. *Review of Financial Studies* 16(1):101–143.
- Ben-David I, Franzoni F, Moussawi R, Sedunov J (2021) The granular nature of large institutional investors. *Management Science* 67(11):6629–6659.
- Bolton P, Kacperczyk M (2021a) Do investors care about carbon risk? *Journal of Financial Economics* 142(2):517–549.
- Bolton P, Kacperczyk M (2021b) Global pricing of carbon-transition risk. Working paper 28510, National Bureau of Economic Research.
- Chabi-Yo F, Dim C, Vilkov G (2022) Generalized bounds on the conditional expected excess return on individual stocks. *Management Science* Forthcoming.
- Cohen L, Gurun U, Nguyen Q (2021) The ESG-innovation disconnect: Evidence from green patenting, Working paper, European Corporate Governance Institute.
- Kelly B, Pástor L, Veronesi P (2016) The price of political uncertainty: Theory and evidence from the option market. *Journal of Finance* 71(5):2417–2480.
- Loughran T, McDonald B (2011) When is a liability not a liability? Textual analysis, dictionaries, and 10-Ks. *Journal of Finance* 66(1):35–65.
- Martin I (2017) What is the expected return on the market? *The Quarterly Journal of Economics* 132(1):367–433.
- Martin I, Wagner C (2019) What is the expected return on a stock? *Journal of Finance* 74(4):1887–1929.
- Newey WK, West KD (1987) A simple, positive-semidefinite, heteroskedasticity and autocorrelation consistent covariance matrix. *Econometrica* 55(3):703–708.
- Pastor L, Stambaugh RF, Taylor LA (2021) Dissecting green returns. Working paper 28940, National Bureau of Economic Research.
- Sautner Z, van Lent L, Vilkov G, Zhang R (2022) Firm-level climate change exposure. *Journal of Finance* Forthcoming.
- Vilkov G (2020) Option-implied data and analysis, technical report, Frankfurt School of Finance and Management.
